# Supplementary material for: ﻿New and interesting species of Penicillium (Eurotiomycetes, Aspergillaceae) in freshwater sediments from Spain
Source: PubMed Central journal article supplement (PMC8825427; doi:10.3897/mycokeys.86.73861), 2022-02-01
Supplement: mycokeys-86-103-s001.pdf [file mycokeys-86-103-s001.pdf]

## SUPPLEMENTARY MATERIAL-Figures S1-S9

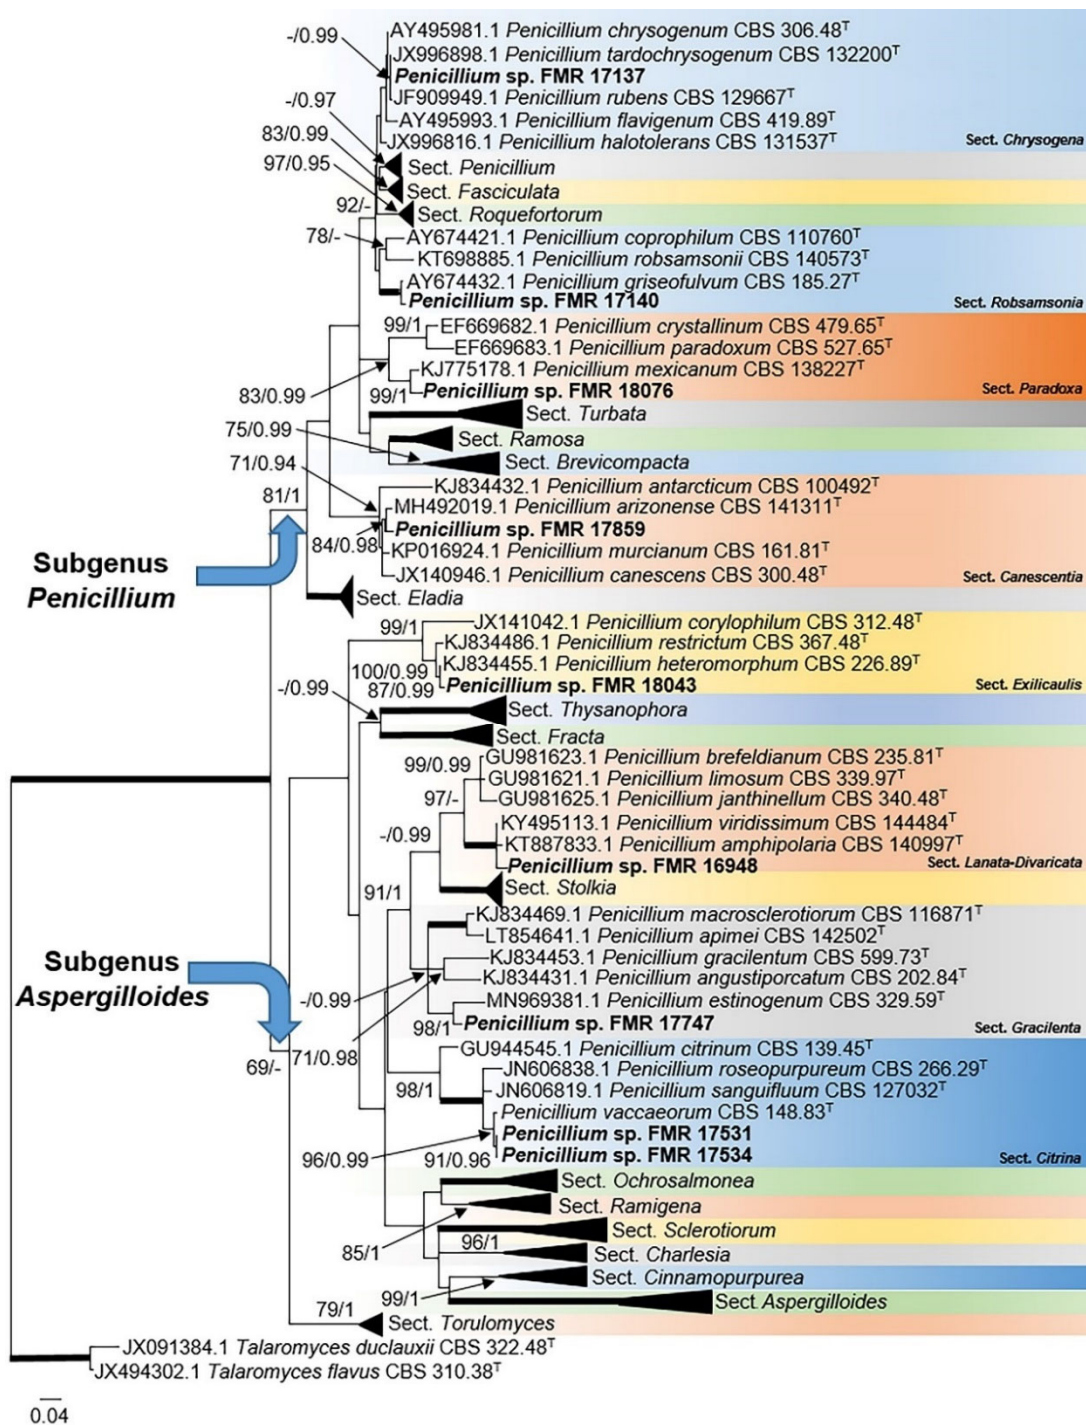

**Figure S1.** ML tree of all *Penicillium* sections inferred from *tub2* including the strains recovered from freshwater sediments studied in this work. Determined by MEGA software, the best nucleotide substitution model for ML analysis was K2+G+I. Determined by jModelTest, the best nucleotide substitution model for BI analysis was HKY+G+I. The aligned dataset was 525 bp long, with 375 variable sites and 357 phylogenetically informative. Branch lengths are proportional to phylogenetic distance. Some of the larger branches were condensed, with the proportions showed above the parallel diagonal lines. Bold branches indicate bs/pp values 100/1. Bootstrap support values/Bayesian posterior probability scores above 69 %/0.94 are indicated on the nodes. The tree is rooted to *Talaromyces flavus* CBS 310.38 and *Talaromyces duclauxii* CBS 322.48. <sup>T</sup>= Ex-type strain.

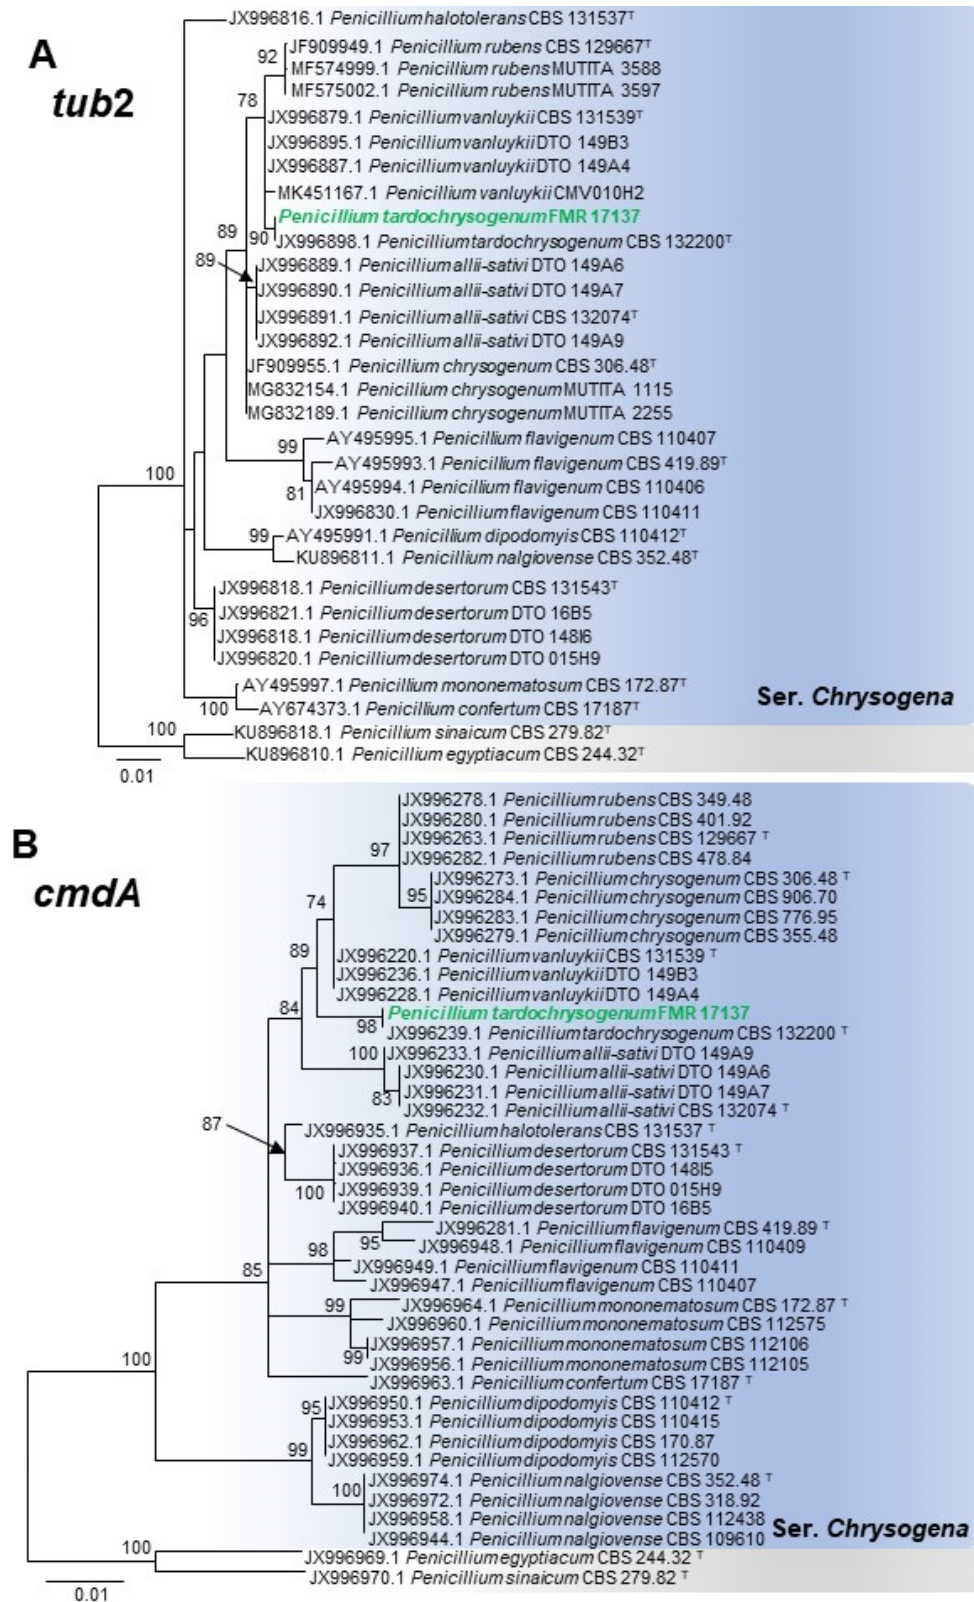

**Figure S2:** RAxML tree of selected strains of *Penicillium* in section *Chrysogena*, series *Chrysogena*, inferred from (A) *tub2* and (B) *cmdA*. Determined by Mega software 6.0., K2+G was the best substitution model for both phylogenetic markers. The aligned dataset was 560 and 496 bp long for *tub2* and *cmdA*, respectively, with 55 variable sites and 35 phylogenetically informative sites for *tub2*, and 83 variable sites and 58 phylogenetically informative sites for *cmdA*. Branch lengths are proportional to phylogenetic distance. Bootstrap support values above 70% are indicated on the nodes. The trees are rooted to *P. egyptiacum* CBS 244.32 and *P. sinaicum* CBS 279.82. <sup>†</sup> = Ex-type strain.



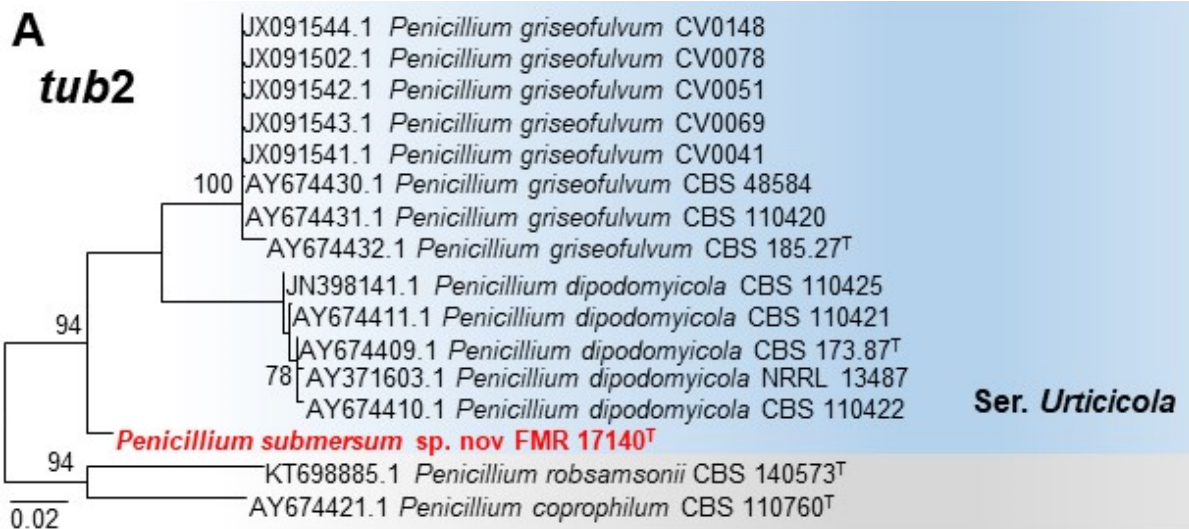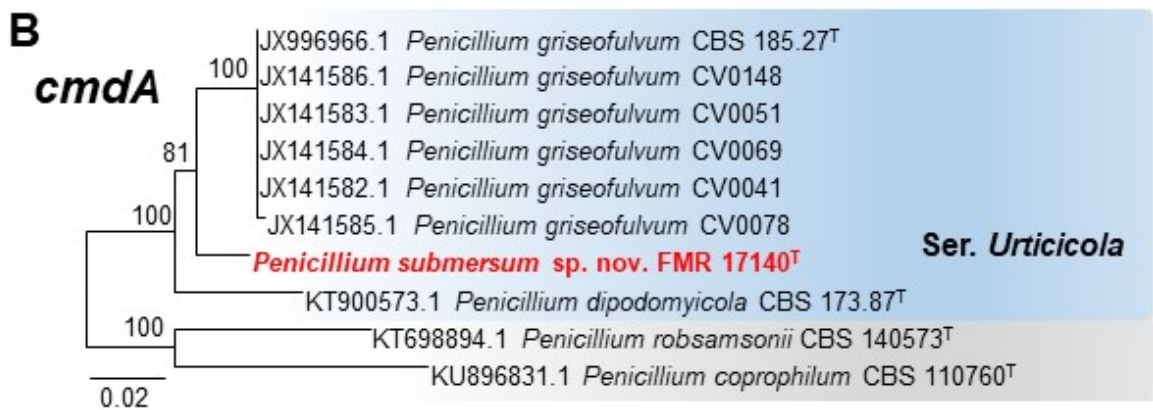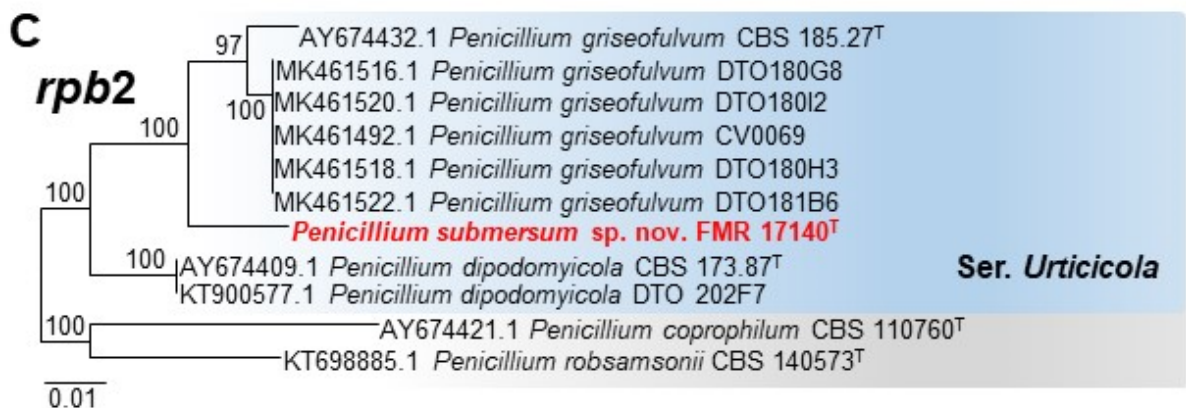

**Figure S3:** RAxML tree of selected strains of *Penicillium* in section *Robsamsonia*, series *Urticicola*, inferred from (A) *tub2*, (B) *cmdA* and (C) *rpb2*. Determined by Mega software 6.0., K2+G was the best substitution model for all phylogenetic markers. The aligned dataset was 462, 503 and 936 bp long for *tub2*, *cmdA* and *rpb2*, respectively, with 75 variable sites and 43 phylogenetically informative sites for *tub2*, 85 variable sites and 29 phylogenetically informative sites for *cmdA*, and 105 variable sites and 48 phylogenetically informative sites for *rpb2*. Branch lengths are proportional to phylogenetic distance. Bootstrap support values above 70% are indicated on the nodes. The trees are rooted to *P. coprophilum* CBS 110760 and *P. robsamsonii* CBS 140573. <sup>T</sup> = Ex-type strain.

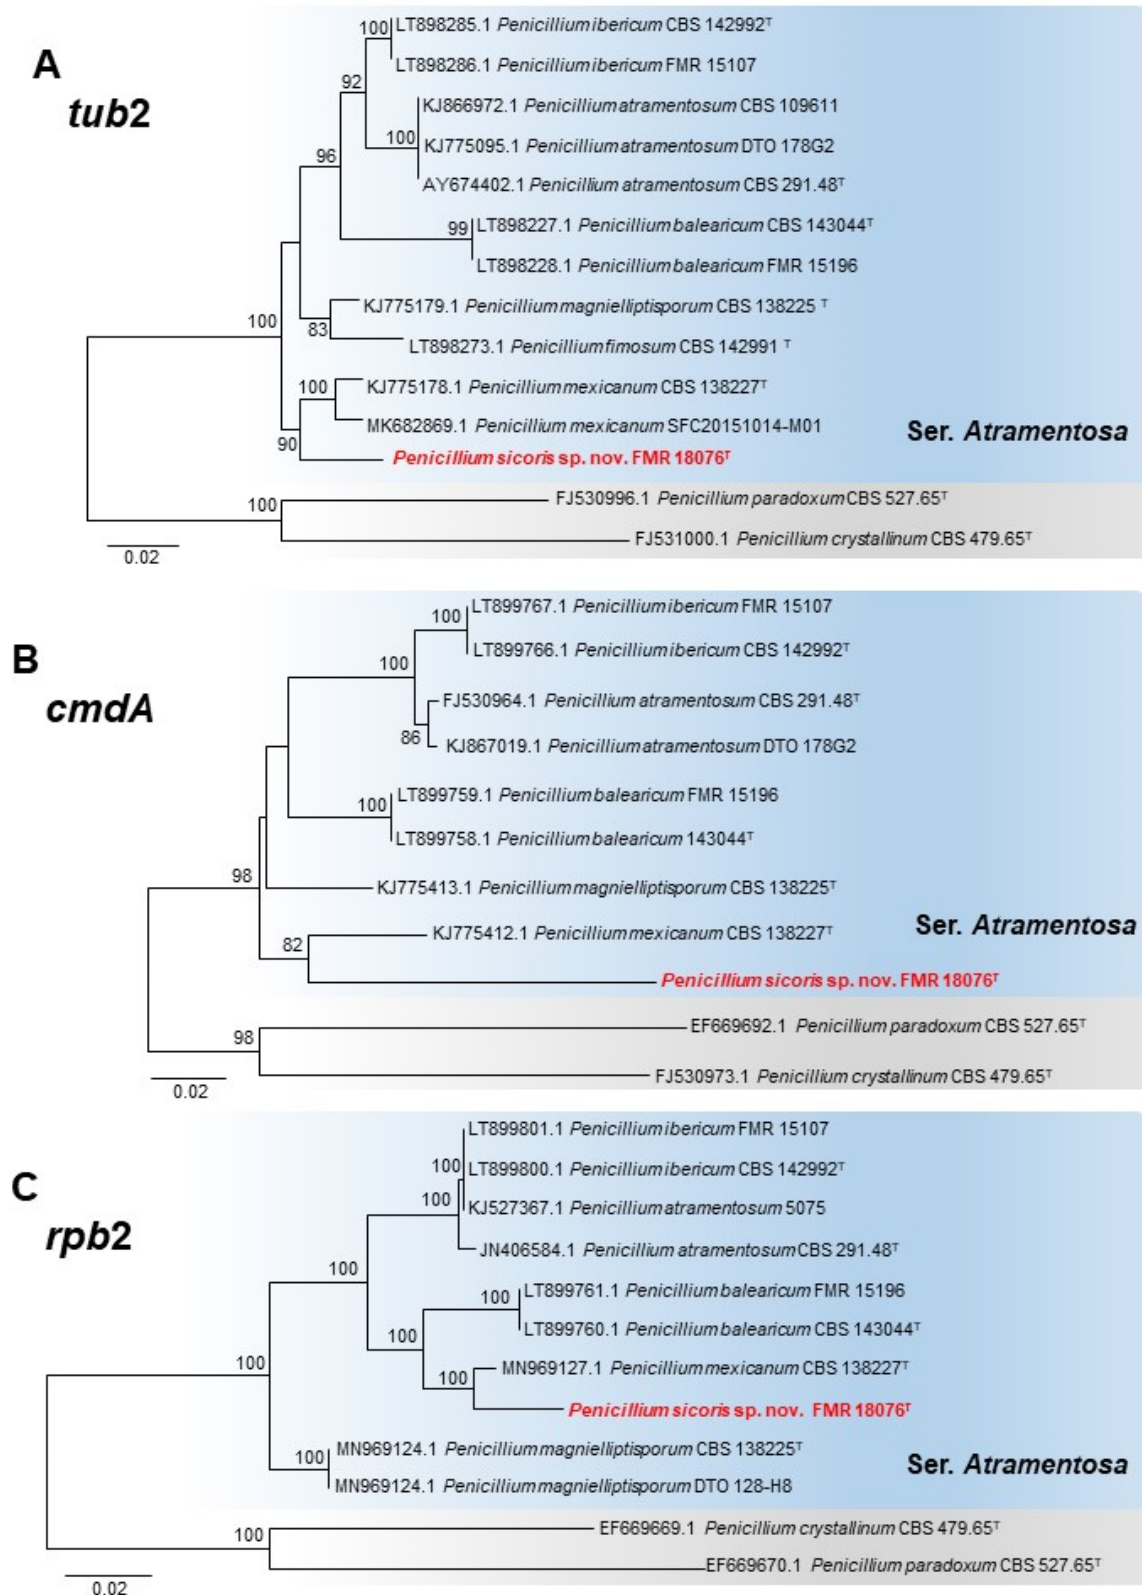

**Figure S4:** RAxML tree of selected strains of *Penicillium* in section *Paradoxa*, series *Atramentosa*, inferred from (A) *tub2*, (B) *cmdA* and (C) *rpb2*. Determined by Mega software 6.0., K2+G was the best substitution model for all phylogenetic markers. The aligned dataset was 491, 525 and 929 bp long for *tub2*, *cmdA* and *rpb2*, respectively, with 120 variable sites and 62 phylogenetically informative sites for *tub2*, 152 variable sites and 62 phylogenetically informative sites for *cmdA*, and 183 variable sites and 103 phylogenetically informative sites for *rpb2*. Branch lengths are proportional to phylogenetic distance. Bootstrap support values above 70% are indicated on the nodes. The trees are rooted to *P. crystallinum* CBS 479.65 and *P. paradoxum* CBS 527.65. <sup>T</sup> = Ex-type strain.



**A**  
*tub2*

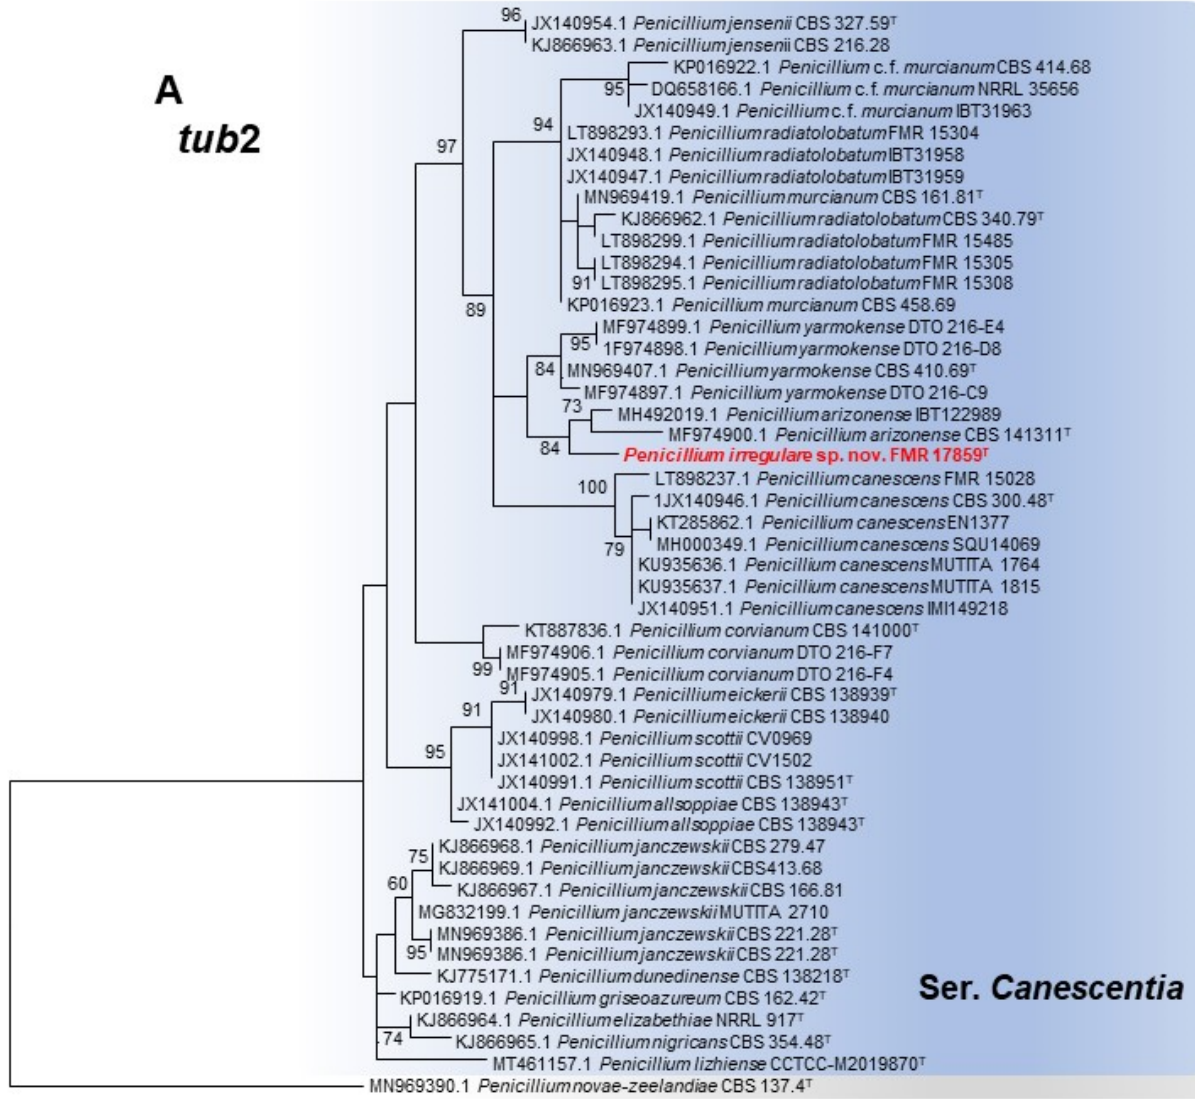

Ser. Canescentia

0.02

**B**  
*cmdA*

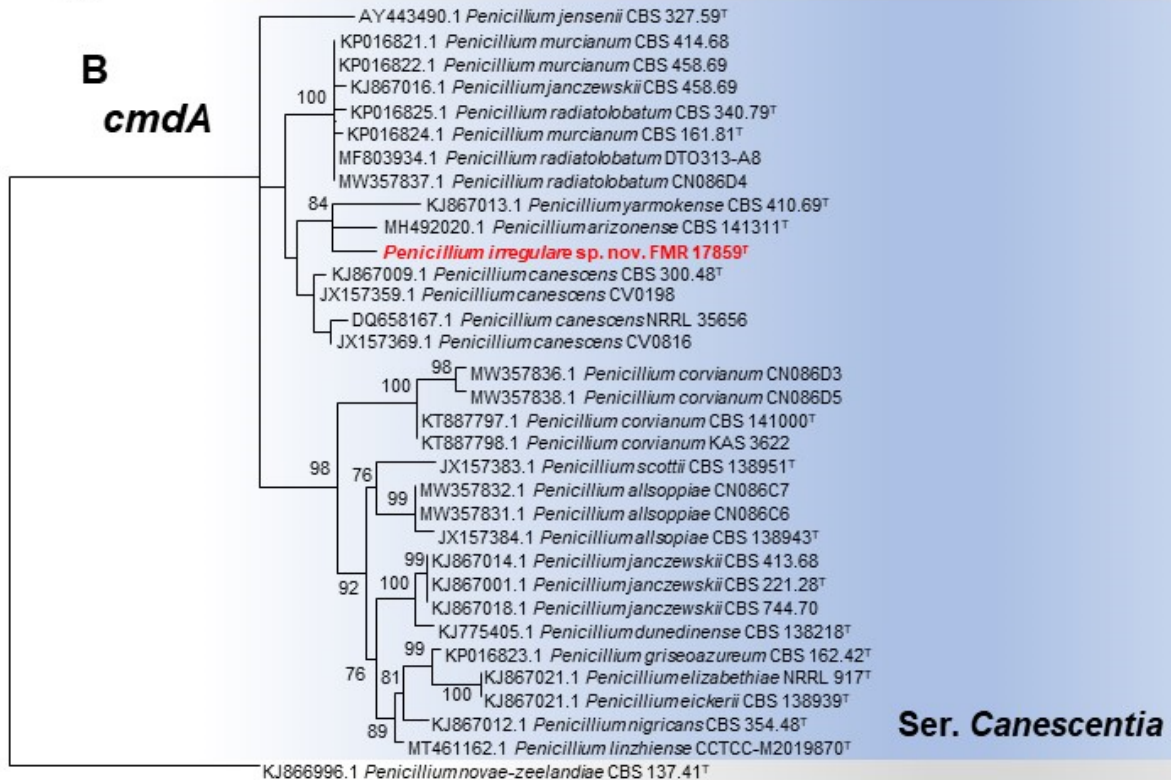

Ser. Canescentia

0.02

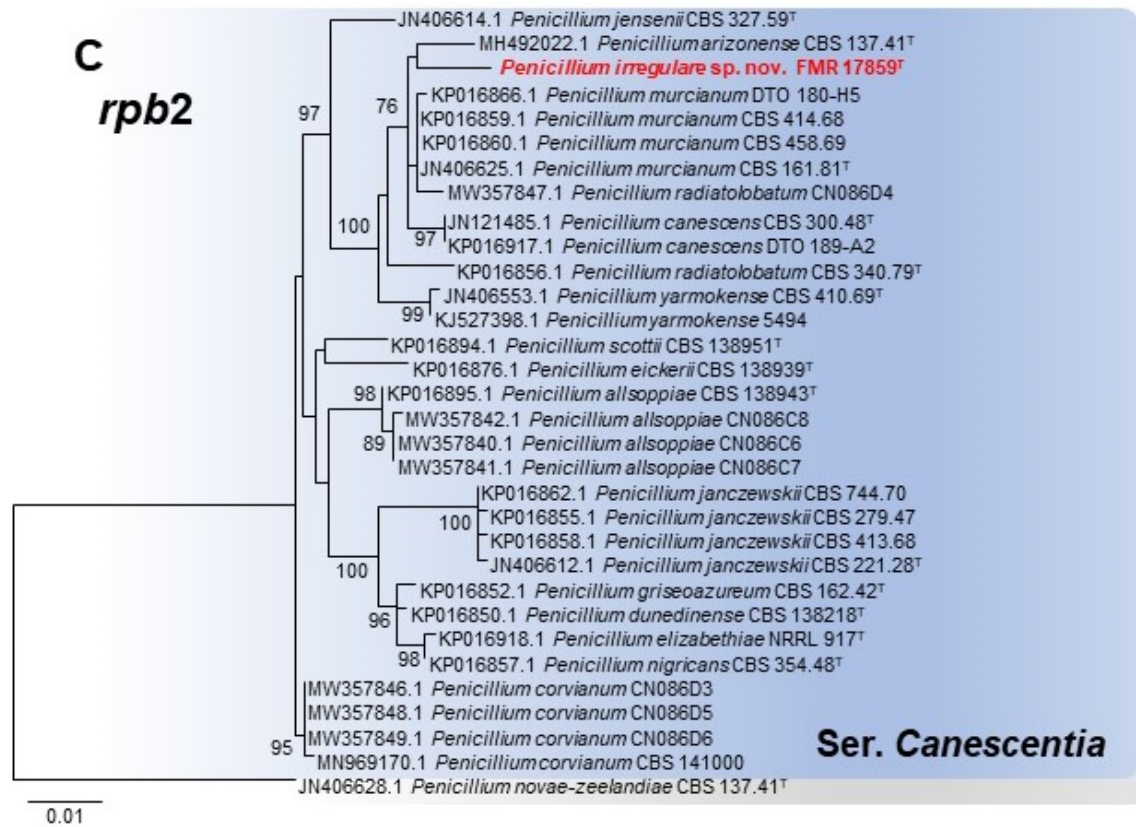

**Figure S5:** RAxML tree of selected strains of *Penicillium* in section *Canescentia*, series *Canescentia*, inferred from (A) *tub2*, (B) *cmdA* and (C) *rpb2*. Determined by Mega software 6.0., K2+G was the best substitution model for all phylogenetic markers. The aligned dataset was 459, 538 and 915 bp long for *tub2*, *cmdA* and *rpb2*, respectively, with 90 variable sites and 48 phylogenetically informative sites for *tub2*, 110 variable sites and 59 phylogenetically informative sites for *cmdA*, and 124 variable sites and 58 phylogenetically informative sites for *rpb2*. Branch lengths are proportional to phylogenetic distance. Bootstrap support values above 70% are indicated on the nodes. The trees are rooted to *P. novae-zeelandiae* CBS 137.41. <sup>T</sup> = Ex-type strain.





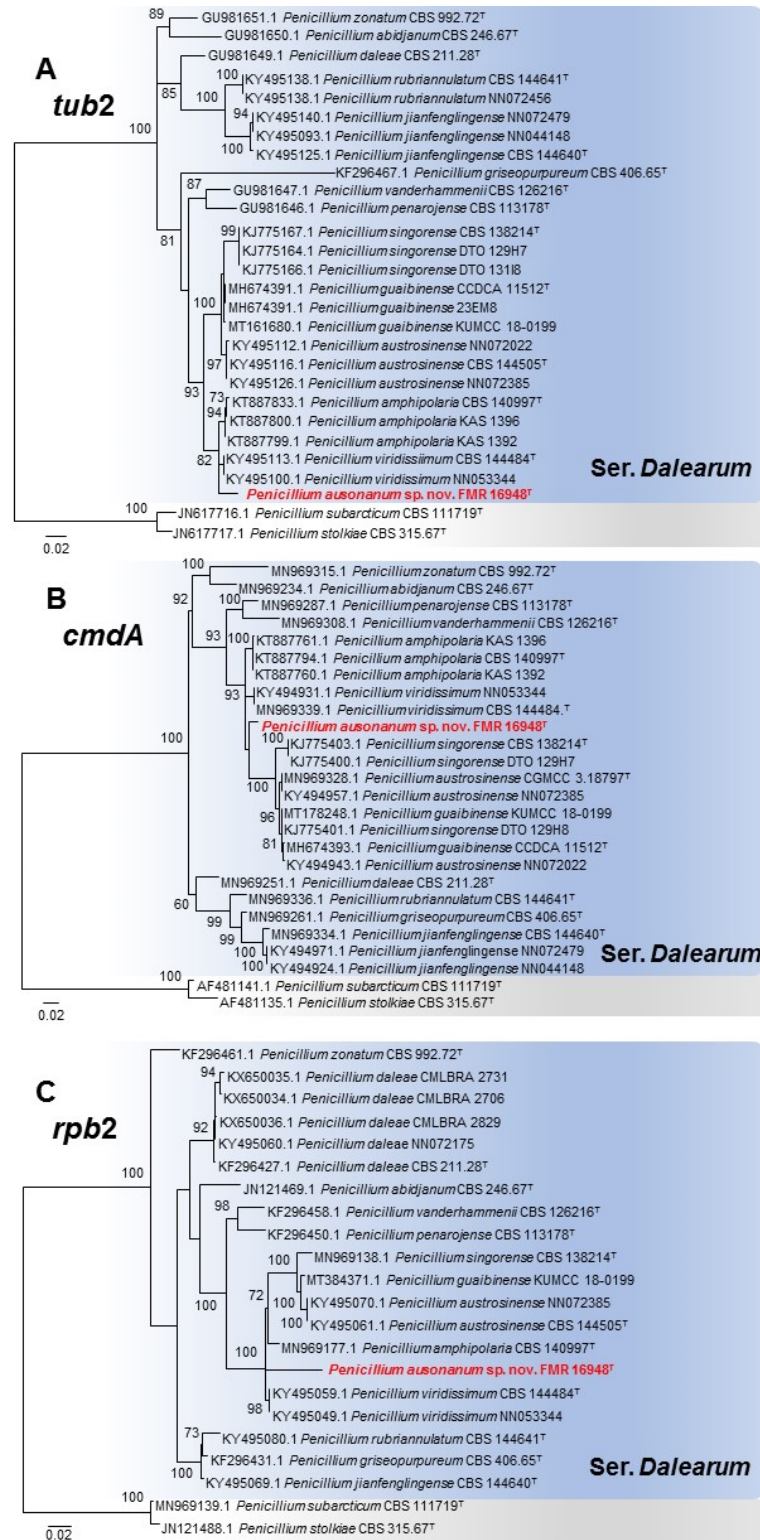

**Figure S7:** RAxML tree of selected strains of *Penicillium* in section *Lanata-Divariata*, series *Dalesarum*, inferred from (A) *tub2*, (B) *cmdA* and (C) *rpb2*. Determined by Mega software 6.0., K2+G was the best substitution model for *tub2*, K2+I for *cmdA* and TN93+G for *rpb2*. The aligned dataset was 526, 566 and 837 bp long for *tub2*, *cmdA* and *rpb2*, respectively, with 183 variable sites and 123 phylogenetically informative sites for *tub2*, 252 variable sites and 161 phylogenetically informative sites for *cmdA*, and 250 variable sites and 190 phylogenetically informative sites for *rpb2*. Branch lengths are proportional to phylogenetic distance. Bootstrap support values above 70% are indicated on the nodes. The trees are rooted to *P. subarcticum* CBS 111719 and *P. stolckiae* CBS 315.67<sup>T</sup> = Ex-type strain.



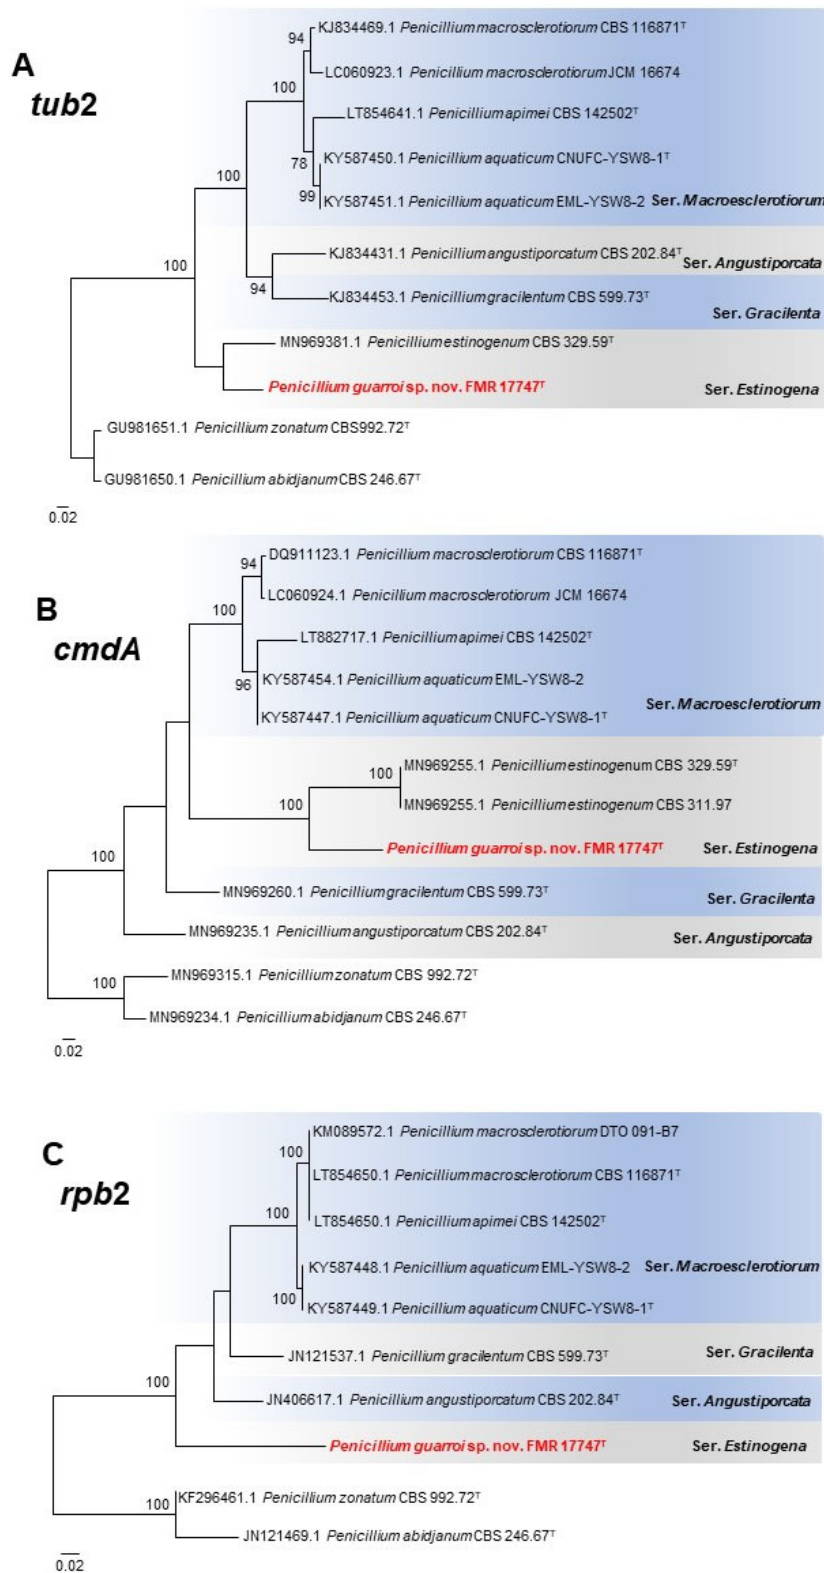

**Figure S8:** RAxML tree of selected strains of *Penicillium* in section *Gracilentia* inferred from (A) *tub2*, (B) *cmdA* and (C) *rpb2*. Determined by Mega software 6.0., K2+I was the best substitution model for *tub2* and *cmdA*, and TN93+G for *rpb2*. The aligned dataset was 525, 643 and 952 bp long for *tub2*, *cmdA* and *rpb2*, respectively, with 201 variable sites and 128 phylogenetically informative sites for *tub2*, 277 variable sites and 202 phylogenetically informative sites for *cmdA*, and 288 variable sites and 184 phylogenetically informative sites for *rpb2*. Branch lengths are proportional to phylogenetic distance. Bootstrap support values above 70% are indicated on the nodes. The trees are rooted to *P. zonatum* CBS 999.72 and *P. abidjanum* CBS 246.67<sup>T</sup> = Ex-type strain.

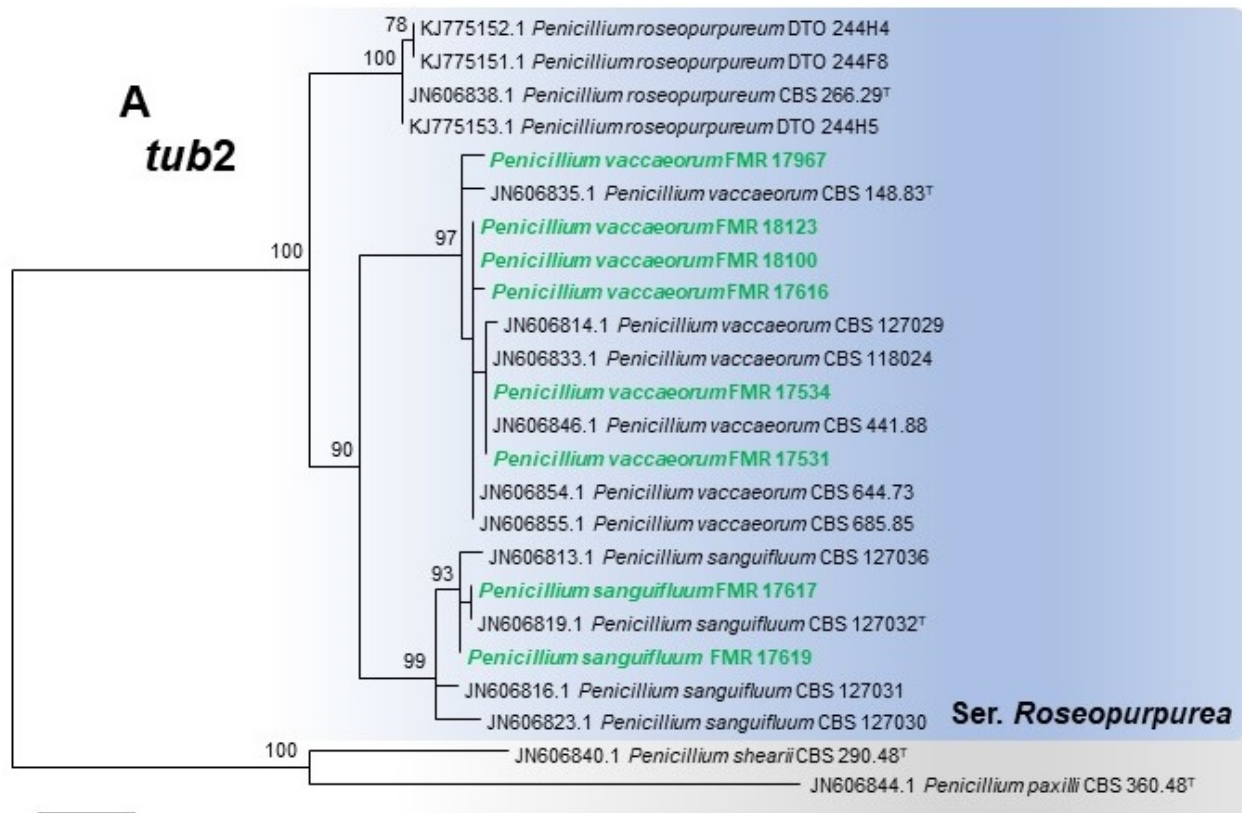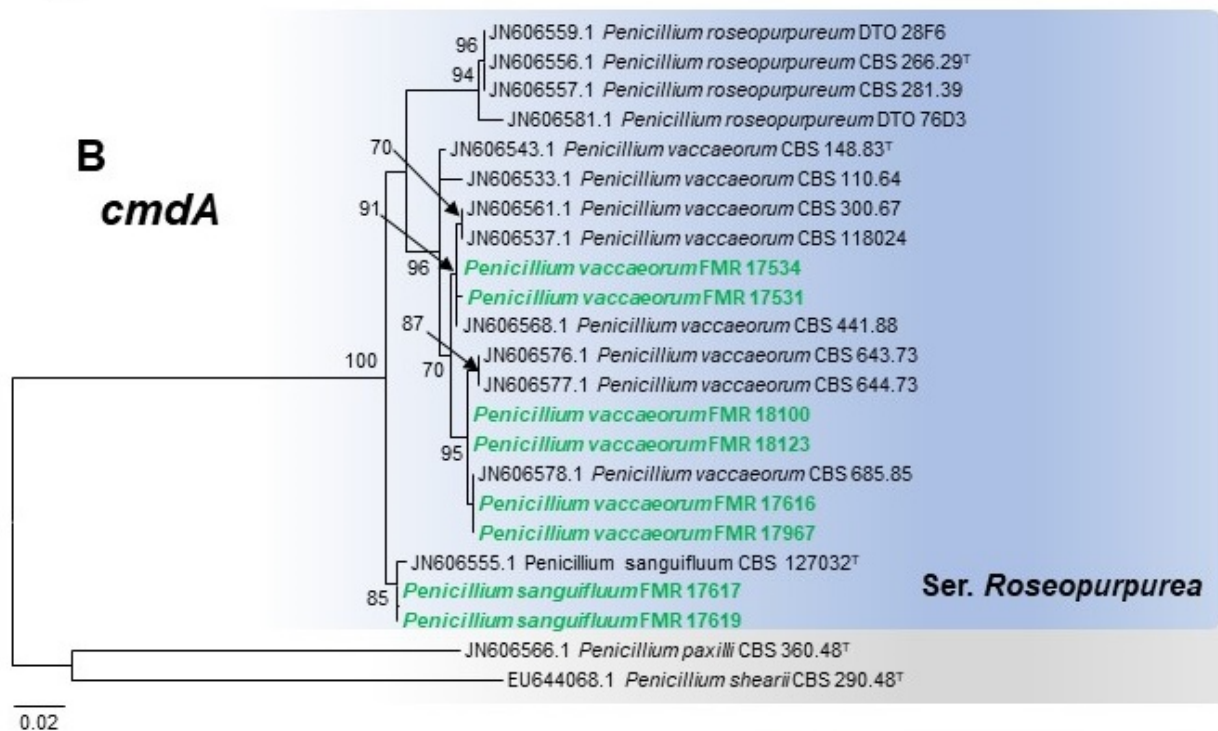

**Figure S9:** RAxML tree of selected strains of *Penicillium* in section *Citrina*, series *Roseopurpurea*, inferred from (A) *tub2* and (B) *cmdA*. Determined by Mega software 6.0., K2+G was the best substitution model for both gene markers. The aligned dataset was 456 and 584 bp long for *tub2* and *cmdA*, respectively, with 116 variable sites and 61 phylogenetically informative sites for *tub2*, and 173 variable sites and 68 phylogenetically informative sites for *cmdA*. Branch lengths are proportional to phylogenetic distance. Bootstrap support values above 70% are indicated on the nodes. The trees are rooted to *P. shearii* CBS 290.48 and *P. paxilli* CBS 360.48<sup>T</sup> = Ex-type strain.
